1 Personality traits change after an opportunity to mate

2 Chloé Monestier<sup>a,\*</sup>, Alison M. Bell<sup>a,b</sup>

3

4 <sup>a</sup> Department of Evolution, Ecology and Behavior, University of Illinois, 505 S. Goodwin Ave.,  
5 Urbana, IL 61801, United States

6 <sup>b</sup> Program in Ecology, Evolution, and Conservation Biology, Carl R. Woese Institute for Genomic  
7 Biology, Program in Neuroscience, University of Illinois, Urbana, IL, United States

8

9 \*Corresponding author.

10 E-mail address: [monestier.chloe@gmail.com](mailto:monestier.chloe@gmail.com) (C. Monestier).

11 **ABSTRACT**

12 There is growing evidence that personality traits can change throughout the life course in humans  
13 and nonhuman animals. However, the proximate and ultimate causes of personality trait change  
14 are largely unknown, especially in adults. In a controlled, longitudinal experiment, we tested  
15 whether a key life event for adults – mating – can cause personality traits to change in female  
16 threespine sticklebacks. We confirmed that there are consistent individual differences in activity,  
17 sociability and risk taking, and then compared these personality traits among three groups of  
18 females: 1) control females; 2) females that physically mated; 3) females that socially  
19 experienced courtship but did not mate. Both the physical experience of mating and the social  
20 experience of courtship caused females to become less willing to take risks and less social. To  
21 understand the proximate mechanisms underlying these changes, we measured levels of  
22 excreted steroids. Both the physical experience of mating and the social experience of courtship  
23 caused levels of dihydroxyprogesterone ( $17\alpha,20\beta$ -P) to increase, and females with higher  
24  $17\alpha,20\beta$ -P were less willing to take risks and less social. These results provide experimental  
25 evidence that personality traits and their underlying neuroendocrine correlates are influenced  
26 by formative social and life-history experiences well into adulthood.

27

28 Key words: personality, mating, hormones, sticklebacks

29

## 30 INTRODUCTION

31 An outstanding question in both the human and animal personality literature concerns the  
32 stability of individual differences throughout the life course. By definition, personality traits are  
33 relatively consistent across situations and/or over time [1,2], but they are not immutable, even  
34 in adults. For example, studies in humans have found significant mean-level change in all trait  
35 domains at some point during the life course [3,4]; people become more conscientious, warmer  
36 and calmer after the age of 30 [3]. Personality traits might change over ontogeny due to intrinsic  
37 maturation [4] and/or because juveniles and adults experience different environments, including  
38 different social roles that might favor different behavioral strategies. Alternatively, or in addition,  
39 personality traits might change following a particular experience because the experience exposes  
40 the animal to different selection pressures, and/or represents an important life history decision  
41 that influences residual reproductive value. For example, important events such as  
42 metamorphosis [5,6], migration, dispersal, sexual maturation [7,8], reproduction, parenting, etc.  
43 can expose individuals to different environments and selective pressures, thereby driving  
44 changes in personality traits.

45 Our understanding of the adaptive significance of personality trait change throughout the  
46 life course is limited because the causes of personality trait change are challenging to study. For  
47 one, self-selection can be a problem because some behavioral types of individuals might be more  
48 likely to experience a particular life-history event than others [9,4]. Second, even if all individuals  
49 experience the particular event, they might do so at different times or at different ages; therefore  
50 differences between those that did versus did not experience the event could reflect the  
51 confounding effects of time, age, season or maturation [10,11]. Moreover, it can be difficult to  
52 pinpoint the exact causes of personality trait change following a key life-history event because  
53 life-history events often comprise a series of sub-events leading up to them, making it difficult to  
54 isolate the effects of becoming a parent, for example, from the effects of courtship, mating, and  
55 reproduction, all of which need to occur before parenting can begin.

56 To circumvent these problems, here, we directly measured the impact of a specific life  
57 event - mating - on personality trait development in adult female threespine sticklebacks

58 (*Gasterosteus aculeatus*) in a controlled, randomized and longitudinal experiment. Among life-  
59 history events, the experience of mating and reproducing for the first time is likely to be one of  
60 the most important life events for any organism. For example, courtship and/or sexual  
61 experience often influences subsequent female mate preference [12,13]; females generally  
62 become more selective with mating experience [13]. Therefore, we might expect them to  
63 become more cautious, i.e. less bold and aggressive, after mating. On the other hand, we might  
64 expect females to become more bold after mating because they have less to lose, i.e. their  
65 residual reproductive value is lower. In general, recent theory on the adaptive evolution of  
66 personality traits predicts that a female's recent mating and courtship experience will influence  
67 her willingness to take risks in the future [14,15].

68 Here, we examine the influence of mating for the first time on personality trait  
69 development in female sticklebacks. Sticklebacks are famous for their natural intraspecific  
70 variation in behavior [16,17], and a previous study found that the experience of reproduction and  
71 parenting influenced the development of risk taking behavior in male sticklebacks [18]. In  
72 contrast to males, female sticklebacks do not provide parental care. Instead, female sticklebacks  
73 become gravid and lay eggs in males' nests, where they are fertilized externally [17,19].  
74 Sticklebacks from most freshwater populations die at the end of their first and only breeding  
75 season [17,19].

76 We repeatedly measured personality traits on individual females and compared three  
77 groups of females: 1) females that did not have an opportunity to mate (control); 2) females that  
78 physically mated; 3) females that had an opportunity to mate and experienced courtship socially  
79 but did not mate (courtship control). Personality traits were repeatedly measured in all groups  
80 of females both before and after females had an opportunity to mate. This experimental design  
81 allowed us to determine if the physical act of mating and reproducing is required to cause  
82 personality traits to change, or if the social experience of courtship is sufficient. In order to track  
83 the potential proximate mechanisms underlying changes in personality traits as a function of  
84 mating, we used a noninvasive method to measure levels of steroids excreted in the water both  
85 before and after a mating opportunity [20]. Given the dramatic neuroendocrine changes  
86 associated with reproduction [21,22], we predicted that females that mated would experience

87 greater steroid fluctuations compared to females that had not mated, and that those hormonal  
88 fluctuations would be related to behavior. We focused on cortisol because of its hypothesized  
89 link to personality variation [23] and on steroids involved in reproduction because it was the life  
90 history event of interest.

91

## 92 **METHODS**

93 Threespine sticklebacks were collected from Putah Creek, California, U.S.A.. Neither males nor  
94 females showed signs of reproductive maturity therefore we assume that females were virgins  
95 at the time of the experiment. Females were housed in all-female groups in 'home' tanks (35.5 L  
96 × 33 W × 25 H cm, 10 fish/tank) with a gravel bottom, plastic plants, and an opaque shelter and  
97 stayed in these home tanks for the duration of the experiment, except when individuals were  
98 transferred to separate 'observation' tanks (60.75 L × 30 W × 20 H cm, set up the exact same as  
99 the home tanks) for behavior trials. Fish were maintained at 20°C on a summer photoperiod (16:  
100 8 h light: dark cycle). The fish were daily fed a mixed diet consisting of frozen bloodworm, brine  
101 shrimp, and Mysis shrimp ad lib each day.

102

### 103 **Experimental design**

104 Individual females were randomly assigned to either the control group or to have a mating  
105 opportunity. Females given a mating opportunity were paired with a control female (matched for  
106 size) who was always measured at the same time as her partner. This design allowed us to control  
107 for variation among females in time to become gravid and to reproduce, as well as for self-  
108 selection, i.e. if some behavioral types of females are less choosy or more attractive than others.  
109 Females in the control group (n = 37) were not exposed to a male or given an opportunity to  
110 mate, but like females in the other conditions, they were socially housed, therefore differences  
111 between control females and females given a mating opportunity do not reflected differences in  
112 the opportunity for social interactions per se. Moreover, many females (n = 12) in the control  
113 group also became gravid over the course of the experiment and released their eggs in their

114 home tank. We tested for the effects of releasing eggs on behavior by comparing the behavior of  
115 control females before vs after releasing eggs, and there was no effect (activity:  $F_{(1,220)} = 2.74$ , p-  
116 val = 0.10; social behavior:  $F_{(1,220)} = 1.57$ , p-val = 0.19; risk-taking behavior:  $F_{(1,220)} = 0.05$ , p-val =  
117 0.82;  $17\alpha,20\beta$ -P:  $F_{(1,12)} = 0.001$ , p-val = 0.99). Therefore, behavioral differences between females  
118 in the control group and females given a mating opportunity do not reflect differences in  
119 gravidity, or the effects of releasing eggs. Some of the females given a mating opportunity (n =  
120 23) mated, while others (n = 22) did not and served as “courtship controls”, because like the  
121 mated females, they had the social experience of being courted, but unlike the mated females  
122 they did not physically mate. We did not detect any latent differences between females that  
123 mated and courtship control females that would lead to nonrandom representation of behavioral  
124 types between the mated and courtship control groups, e.g. mated and courtship control females  
125 did not differ in size ( $t_{43.95} = 0.16$ ,  $P = 0.87$ ) or behavior (see Results). Both courtship control and  
126 mated females had multiple opportunities to mate (mated females: range = 1 – 8 opportunities,  
127 mean  $\pm$  SE =  $2.9 \pm 0.29$ , courtship control females: range = 1 – 7, mean  $\pm$  SE =  $3.4 \pm 0.31$ ).

128 The behavior of females was measured in the behavioral assays on six occasions, thrice in  
129 the “Before” trials and thrice in the “After” trials, with 24 h between trials. Females given a  
130 mating opportunity were placed in a tank with a male who had built a nest (60.75 L  $\times$  30 W  $\times$  20  
131 H cm). Females started the After behavioral assays 24 hours after the mated female reproduced  
132 or after the courtship control female released her eggs in her home tank (presumably to avoid  
133 the costs of becoming egg bound [24]). All females were measured for length and weight on the  
134 last day of the After trials.

135

## 136 **Behavioral assays**

137 *Activity:* The focal fish was placed in a shelter at one end of the tank. After one minute,  
138 the observer gently removed the cork of the shelter, and recorded the number of areas (four 15  
139 cm squares) crossed for three minutes.

140           *Social behavior:* 30 minutes after the activity assay, three females from the same  
141 population were placed into a flask at the opposite side of the refuge and we recorded the  
142 number of times the focal fish contacted the flask for 5 minutes.

143           *Risk taking behavior:* 30 minutes after the social behavior assay, a model great egret  
144 (*Casmerodius albus*) head was placed over the observation tank. Then, we added live  
145 bloodworms directly under the egret. When the focal fish approached the worms within one  
146 body length, we released the egret twice in quick succession, and then fixed the egret so that it  
147 remained above the water. Following this simulated attack, we recorded time foraging under risk  
148 for five minutes.

149

#### 150 **Measuring excreted steroids**

151 After the third trial of both the Before and After trials, we placed the focal fish in a 500 ml long-  
152 necked glass flask filled with 100 ml of water. We then placed the flask in a covered bucket (to  
153 minimize stress) for 30 minutes. Then, we transferred 50 ml of the water into a 50 ml sterile  
154 polypropylene conical tube.

155           Steroids were extracted from the water samples by pulling water through C18 Sep-Pak  
156 cartridges (Waters Ltd.) that had been primed with 5 mL methanol followed by 5 mL distilled  
157 water. After the sample had dripped through at a rate of approximately 2 mL/min, the cartridge  
158 was washed with 5 mL of distilled water, and the steroids were eluted from the columns into  
159 13\*100 mm borosilicate vials via 5 ml of diethyl ether. The ether was dried by evaporation  
160 overnight. The dried hormones were then frozen at -80°C.

161           Samples were analyzed via mass spectrometry with the 5500 QTRAP LC/MS/MS system  
162 (AB Sciex, Foster City, CA). In order to control for differences in body size, hormone release rates  
163 were calculated as the amount of released hormone per gram of body weight per hour (ng/g/hr).  
164 We focus here on 17 $\alpha$ ,20 $\beta$ -P (17 $\alpha$ ,20 $\beta$ -dihydroxy-4-pregnen-3-one, hereafter referred to as  
165 17 $\alpha$ ,20 $\beta$ -P, n = 19 individuals with one measure Before and one measure After).

166

167 **Statistical analyses**

168 *Repeatability of behavior and hormones*

169 To confirm that there were consistent individual differences in behavior, we estimated  
170 repeatability during the Before trials. Repeatability for the three treatment groups was estimated  
171 separately to confirm that all groups showed similar patterns prior to the mating opportunity. To  
172 test whether mating influences rank-order stability, we estimated the repeatability of behavior  
173 and hormone titres across the six Before and After trials for the treatment groups separately.

174 Repeatability was estimated as the ratio of between-individual variance to total variance  
175 with linear mixed-effects models (with individual identity as a random factor) in R v.3.4.4  
176 (<http://www.r-project.org>) [25].

177

178 *How do personality traits and hormones change following mating?*

179 To detect mean-level personality trait change after mating, we used linear mixed-effects models  
180 (LMMs) with the lmer function in the R package lme4 v.1.1-17 [26]. Models included the following  
181 fixed effects: treatment (three levels: control, courtship control, and mated), Before/After (two  
182 levels: before vs after mating), trial nested within Before/After, the number of days between the  
183 first and sixth trial (days in the experiment), the number of mating attempts, the interaction  
184 between treatment x Before/After, and individual as a random effect.

185 We used LMMs to investigate changes in hormonal release rate according to the same  
186 explanatory variables cited above. However, we split the all data set by the period (Before/After)  
187 as we did not have enough statistical power to test for the interaction between treatment and  
188 period. We used LM to investigate a potential link between hormones and personality traits  
189 (average behavior across the three before or after trials).

190 More details about the methods (behaviors recorded, hormones measured and their  
191 relevance, detailed protocols and technics, and statistics) are in electronic supplementary  
192 material.



193

## 194 **RESULTS**

### 195 **Repeatability of behavior**

196           During the Before trials, individual differences in behavior were repeatable in all  
197 treatment groups (electronic supplementary material, Table S1), confirming these behaviors can  
198 be considered personality traits. Among-individual variation was consistently higher than within-  
199 individual variation.

200           Individual differences in behavior were also repeatable between the Before and After  
201 trials (Table 1) indicating some element of stability of individual behavioral types throughout the  
202 experiment. However, the repeatability of social behavior and risk taking behavior before and  
203 after the mating opportunity was significantly lower in both the mated and courtship control  
204 treatment groups compared to the control group (Table 1). This pattern appears to reflect greater  
205 among-individual variation in the control group, and higher within-individual variation in the  
206 mated and courtship control groups (Table 1). Greater within-individual variation in the mated  
207 and courtship control groups is visually evident in the behavioral reaction norms (electronic  
208 supplementary material, Fig. S1), especially between trials 3 and 4, i.e. the interval during which  
209 females in these groups experienced courtship and/or mating. The repeatability of activity did  
210 not differ among the three treatment groups (Table 1).

211

### 212 **Effects of a mating opportunity on behavior**

213           We did not detect any differences among the treatment groups in activity during the  
214 Before ( $F_{(2,243)} = 2.90$ , p-val = 0.10) or After trials ( $F_{(2,243)} = 0.48$ , p-val = 0.62), and no difference in  
215 activity between the Before and After trials ( $F_{(2,489)} = 2.29$ , p-val = 0.13) (Fig. 1A).

216           Females in both the mated and courtship control groups were less social (fewer contacts  
217 with conspecifics) after they were given a mating opportunity ( $t_{131.97} = -4.09$ ,  $P < 0.001$ ;  $t_{123.21} = -$   
218  $4.07$ ,  $P < 0.001$ , respectively), but the social behavior of females in the control group did not

219 change across the experiment ( $t_{217.44} = 0.34$ ,  $P = 0.73$ , Fig. 1B). The mated and courtship control  
220 females did not differ in social behavior ( $t_{263.19} = -1.54$ ,  $P = 0.12$ ). Females in the three treatment  
221 groups did not differ in social behavior during the Before trials ( $F_{(2,243)} = 1.93$ ,  $p\text{-val} = 0.15$ ).

222 Time foraging under risk was lower in both the mated and courtship control groups after  
223 they were given a mating opportunity ( $t_{131.81} = -3.19$ ,  $P < 0.001$ ;  $t_{129.63} = -4.52$ ,  $P < 0.001$ ,  
224 respectively), but the time that control females spent foraging under risk did not vary across the  
225 experiment ( $t_{219.67} = -0.09$ ,  $P = 0.93$ , Fig. 1C). The mated and courtship control groups did not  
226 differ ( $t_{265.57} = -1.4$ ,  $P = 0.13$ ). Females in the three treatment groups did not differ in risk taking  
227 behavior during the Before trials ( $F_{(2,243)} = 0.13$ ,  $p\text{-val} = 0.88$ ).

228 Non-significant results about the other explanatory variables are in the electronic  
229 supplementary material.

230

### 231 **17 $\alpha$ ,20 $\beta$ -P was higher after a mating opportunity and was negatively correlated with social** 232 **behavior and risk taking behavior**

233 The experience of courtship caused 17 $\alpha$ ,20 $\beta$ -P to increase: 17 $\alpha$ ,20 $\beta$ -P did not differ  
234 among the three treatment groups during the Before trials ( $F_{(2,16)} = 1.69$ ,  $p\text{-val} = 0.22$ ), but  
235 17 $\alpha$ ,20 $\beta$ -P was significantly higher during the After trials in both the mated and courtship control  
236 groups compared to the control group ( $F_{(2,16)} = 3.49$ ,  $p\text{-val} = 0.04$ , electronic supplementary  
237 material Fig. S2).

238 We did not detect a relationship between behavior and 17 $\alpha$ ,20 $\beta$ -P during the Before trials  
239 (number of contacts:  $F_{(1,17)} = 0.42$ ,  $p\text{-val} = 0.52$ ; willingness to forage under risk:  $F_{(1,17)} = 0.24$ ,  $p\text{-val} = 0.63$ ). However, during the After trials, there was a negative relationship between the level  
240 of 17 $\alpha$ ,20 $\beta$ -P and both the number of contacts ( $F_{(1,17)} = 5.94$ ,  $p\text{-val} = 0.02$ , Fig. 2) and the  
241 willingness to forage under risk ( $F_{(1,17)} = 8.02$ ,  $p\text{-val} = 0.01$ , Fig. 2). Visual inspection of the data  
242 suggests that this pattern was particularly strong among females that had an opportunity to mate  
243 (Fig. 2). We did not detect a relationship between activity and 17 $\alpha$ ,20 $\beta$ -P (respectively,  $F_{(1,17)} =$   
244  $0.21$ ,  $p\text{-val} = 0.64$ ).

246 Non-significant results about other steroids are in the electronic supplementary material.

247

## 248 **DISCUSSION**

249           This study addresses important questions about personality change throughout the  
250 lifespan by analyzing the stability and change of personality traits in a controlled, randomized  
251 and longitudinal experiment. Specifically, we analyzed how repeatability, within and among  
252 individual variation in personality, and mean level changes in personality traits depend on a key  
253 life event: mating for the first time. We provide evidence that adult females became less social  
254 and less willing to take risks after a mating opportunity.

255           This conclusion is bolstered by the study's strong experimental design. We confirmed that  
256 there are consistent individual differences in behavior by repeatedly measuring the same  
257 individuals in a battery of behavioral assays. The repeated measures design revealed that  
258 individuals given a mating opportunity retained their new behavioral type for the duration of the  
259 experiment. Moreover, it allowed us to compare within- and among-individual variance  
260 components, revealing greater within-individual variation in individuals given a mating  
261 opportunity compared to the control group. This is strong evidence that the mean-level  
262 differences between treatment groups reflects within-individual change, i.e. individuals changed  
263 their behavior after a mating opportunity. In addition, we confirmed that self-selection was not  
264 a problem: at the beginning of the experiment, females in the three treatment groups did not  
265 differ in behavior, but they diverged following the mating opportunity.

266           Interestingly, regardless of whether they physically mated or if they just had the social  
267 experience of courtship, females became less social and less willing to take risks after a mating  
268 opportunity. We do not know why some females given a mating opportunity mated and others  
269 did not. It is possible, for example, that mated females experienced less aggression from males  
270 during the mating opportunity, that mated females were more attractive to males, that mated  
271 females were less choosy, or less interested in mating generally. However, prior to entering the  
272 experiment, we did not detect any differences in behavior or body size or reproductive state  
273 (gravidity) between mated and courtship control females (electronic supplementary material),  
274 both types of females were given numerous opportunities opportunities to mate. There was not

275 a systematic difference between the males that were offered to females that did versus did not  
276 mate, and we ensured that all females were gravid and ready to spawn when given a mating  
277 opportunity. Mate choice in sticklebacks is mutual [27]; therefore, we suspect that some females  
278 did not mate simply because they were not offered the right match. Despite the fact that mated  
279 vs courted females might have differed in attractiveness, choosiness or the way they interacted  
280 with males, both types of females became less social and less willing to take risks and experienced  
281 an increase in progesterone. These results strongly suggest that there is something about the  
282 experience of having an opportunity to mate with males that changes females' personality, i.e.  
283 the social experience is sufficient to cause personality traits to change. That mating and  
284 experiencing courtship do not differ in their impact on female personality might stem from the  
285 fact that mating in this system is similarly costly to experiencing courtship. The similar effects on  
286 personality may be from the similar physiological impacts of the behaviors involved in each case;  
287 a different outcome might be expected when the act of mating for females is more costly than  
288 engaging in courtship only. If that is the case, then the impact of a mating opportunity on  
289 personality in this study may be a conservative example of the impact of mating when  
290 considering systems in which the females then go on to perform parental care.

291 The similarity between courtship control and mated females in this experiment suggest  
292 that social experience with potential mates – not just sexual experience – can influence  
293 personality traits in females. This result is consistent with what we know about the importance  
294 of social experience for behavior in both humans and nonhuman animals. For example, for young  
295 adults, people's openness and their interaction with their social environment influences their  
296 chances of meeting a partner [28,29]. The nonhuman animal literature is rife with examples  
297 showing that previous courtship experience with male signals alters female mating decisions  
298 [13,30]: females are often more choosy about their mates after social experience with an  
299 attractive male and less choosy after social experience with an unattractive male, presumably  
300 because females change their preference functions as they update their estimate of the  
301 distribution of mate quality [31]. Indeed, there is evidence that female sticklebacks modify their  
302 mate preference in response to their estimate of the quality and availability of mates [32,33].  
303 Therefore, it is possible that females used the mating opportunity in this experiment to update

304 their assessment of mate availability, which went on to influence their social and risk taking  
305 behavior.

306 Females excreted more  $17\alpha,20\beta$ -P after they were given a mating opportunity, regardless  
307 of whether they mated, and individual variation in behavior was related to individual variation in  
308  $17\alpha,20\beta$ -P.  $17\alpha,20\beta$ -P promotes the secretion of ovarian fluid in sticklebacks [34] and it is likely  
309 that it is the maturation inducing hormone in stickleback [24]. In other fishes, a sharp peak of  
310  $17\alpha,20\beta$ -P occurs prior to spontaneous or induced ovulation [35,36]. Studies in goldfish and other  
311 fishes have shown that exposure to a potential mate can trigger ovulation, presumably via  
312 pheromones [37], and there is some evidence for chemical communication between males and  
313 females during courtship in stickleback [38]. Therefore, the higher levels of  $17\alpha,20\beta$ -P in females  
314 given a mating opportunity in this experiment could reflect their recent experience with a  
315 potential mate. Alternatively, because  $17\alpha,20\beta$ -P can act as a pheromone used during  
316 communication among females [39], higher levels of  $17\alpha,20\beta$ -P in both the mated and courtship  
317 control groups might reflect  $17\alpha,20\beta$ -P that was released by females that mated while they were  
318 co-housed with courtship control females. Interestingly, contrary to our prediction based on the  
319 coping styles literature [23], cortisol did not appear to be involved in mediating the effects of a  
320 mating opportunity on personality.

321 Regardless of the proximate physiological mechanisms involved, the finding that risk  
322 taking behavior and social behavior decreased following a mating opportunity is consistent with  
323 theory which posits that life-history tradeoffs - specifically between investment in current and  
324 future reproduction - can generate behavioral types [14]. Specifically, individuals with a greater  
325 expectation of future reproduction are expected to be shyer and less aggressive than individuals  
326 with a lower expectation of future reproduction [14]. In the context of this experiment, females  
327 that had an opportunity to mate may have interpreted this experience as information that  
328 potential mates are abundant, therefore these females may have a higher expectation for future  
329 reproduction, and thus became less social and less willing to take risks in order to protect their  
330 assets [15].

331 It is now a truism that early life experience is important for behavioral development in  
332 humans and nonhuman animals [4,40], but whether and why personality traits continue to  
333 change through adulthood is less understood. Experimental studies that manipulate and control  
334 particular life events in nonhuman animals have the potential to make important contributions  
335 in this area. Moreover, this topic deserves more attention in the animal personality literature  
336 because it has a number of ecological and evolutionary implications that have yet to be explored.  
337 For example, personality change in young wild individuals may have strong consequence for  
338 dispersal and/or the establishment of social groups, with potential consequences for social  
339 interactions among individuals within the group. More generally, these results highlight the  
340 importance of phenotypic plasticity over ontogeny for the generation and maintenance of  
341 personality variation within natural populations; changes in the timing of important life history  
342 events or other experiences could have consequences for the distribution of personality variation  
343 within natural populations.

344

345 Ethics. All applicable international, national, and/or institutional guidelines for the care  
346 and use of animals were followed. All procedures performed in this study involving animals were  
347 in accordance with the ethical standards of the University of Illinois, Urbana Champaign (IACUC  
348 protocol #18080).

349 Data accessibility. Data available from the Dryad Digital Repository at: Digital Repository  
350 at: <https://doi.org/10.5061/dryad.wstqjq2h3> [41].

351 Authors' contributions. C.M. contributed to study design, carried out the experiment and  
352 the laboratory work, analyzed the data, and co-wrote the manuscript; A.M.B. contributed to  
353 study design and co-wrote the manuscript.

354 Competing interests. We declare we have no competing interests.

355 Funding. The experiment was supported by the University of Illinois at Urbana-Champaign  
356 (UIUC).

357 Acknowledgements. The authors thank Dana Joulani, Katie Julkowski, Jason Keagy, Lucas  
358 Li, Ilva Mane, Ryan Paitz, Jake Ritthamel, and Rosie Zhang. This work was supported by a

359 fellowship from the Fyssen foundation to CM, grants from the NIH (2R01GM082937-06A1) and NSF  
360 (IOS 1121980), and the University of Illinois at Urbana-Champaign.

361 **REFERENCES**

- 362 1. Gosling SD. 2001 From mice to men: What can we learn about personality from animal  
363 research? *Psychological Bulletin* **127**, 45–86. (doi:10.1037/0033-2909.127.1.45)
- 364 2. Réale D, Reader SM, Sol D, McDougall PT, Dingemanse NJ. 2007 Integrating animal  
365 temperament within ecology and evolution. *Biological Reviews* **82**, 291–318.  
366 (doi:10.1111/j.1469-185X.2007.00010.x)
- 367 3. Roberts BW, Walton KE, Viechtbauer W. 2006 Patterns of mean-level change in personality  
368 traits across the life course: A meta-analysis of longitudinal studies. *Psychological Bulletin*  
369 **132**, 1–25. (doi:10.1037/0033-2909.132.1.1)
- 370 4. Costa PT, McCrae RR, Löckenhoff CE. 2019 Personality across the life span. *Annual Review of*  
371 *Psychology* **70**, 423–448. (doi:10.1146/annurev-psych-010418-103244)
- 372 5. Wilson ADM, Krause J. 2012 Personality and metamorphosis: is behavioral variation  
373 consistent across ontogenetic niche shifts? *Behav Ecol* **23**, 1316–1323.  
374 (doi:10.1093/beheco/ars123)
- 375 6. Müller T, Müller C. 2015 Behavioural phenotypes over the lifetime of a holometabolous  
376 insect. *Frontiers in Zoology* **12**, S8. (doi:10.1186/1742-9994-12-S1-S8)
- 377 7. Edenbrow M, Croft DP. 2011 Behavioural types and life history strategies during ontogeny in  
378 the mangrove killifish, *Kryptolebias marmoratus*. *Animal Behaviour* **82**, 731–741.  
379 (doi:10.1016/j.anbehav.2011.07.003)
- 380 8. Favati A, Zidar J, Thorpe H, Jensen P, Løvlie H. 2015 The ontogeny of personality traits in the  
381 red junglefowl, *Gallus gallus*. *Behav Ecol* **27**, 484–493. (doi:10.1093/beheco/arv177)
- 382 9. Specht J, Egloff B, Schmukle SC. 2011 Stability and change of personality across the life  
383 course: The impact of age and major life events on mean-level and rank-order stability of the  
384 Big Five. *Journal of Personality and Social Psychology* **101**, 862–882. (doi:10.1037/a0024950)
- 385 10. Roberts BW, DelVecchio WF. 2000 The rank-order consistency of personality traits from  
386 childhood to old age: a quantitative review of longitudinal studies. *Psychological bulletin* **126**,  
387 3–25.
- 388 11. van de Pol M, Verhulst S. 2006 Age-Dependent Traits: A New Statistical Model to  
389 Separate Within- and Between-Individual Effects. *The American Naturalist* **167**, 766–773.  
390 (doi:10.1086/503331)
- 391 12. Kodric-Brown A, Nicoletto PF. 2001 Age and Experience Affect Female Choice in the  
392 Guppy (*Poecilia reticulata*). *The American Naturalist* **157**, 316–323. (doi:10.1086/319191)



- 393 13. Jennions MD, Petrie M. 1997 Variation in mate choice and mating preferences: a review  
394 of causes and consequences. *Biological Reviews* **72**, 283–327.  
395 (doi:10.1017/S0006323196005014)
- 396 14. Wolf M, Doorn GS van, Leimar O, Weissing FJ. 2007 Life-history trade-offs favour the  
397 evolution of animal personalities. *Nature* **447**, 581–584. (doi:10.1038/nature05835)
- 398 15. McElreath R, Luttbeg B, Fogarty SP, Brodin T, Sih A. 2007 Evolution of animal  
399 personalities. *Nature* **450**, E5–E5. (doi:10.1038/nature06326)
- 400 16. Huntingford FA. 1976 The relationship between anti-predator behaviour and aggression  
401 among conspecifics in the three-spined stickleback, *Gasterosteus Aculeatus*. *Animal*  
402 *Behaviour* **24**, 245–260. (doi:10.1016/S0003-3472(76)80034-6)
- 403 17. Foster SA, Bell MA. 1994 *The evolutionary biology of the threespine stickleback*. Oxford:  
404 Oxford University Press. See  
405 [https://life.bio.sunysb.edu/ee/belllab/Bell\\_Foster\\_Book/Front\\_Material.pdf](https://life.bio.sunysb.edu/ee/belllab/Bell_Foster_Book/Front_Material.pdf).
- 406 18. Stein LR, Trapp RM, Bell AM. 2016 Do reproduction and parenting influence personality  
407 traits? Insights from threespine stickleback. *Animal Behaviour* **112**, 247–254.  
408 (doi:10.1016/j.anbehav.2015.12.002)
- 409 19. Ostlund-Nilsson S, Mayer I, Huntingford FA. 2006 *Biology of the three-spined stickleback*.  
410 CRC Press.
- 411 20. Scott AP, Ellis T. 2007 Measurement of fish steroids in water—a review. *General and*  
412 *Comparative Endocrinology* **153**, 392–400. (doi:10.1016/j.ygcen.2006.11.006)
- 413 21. Macbeth AH, Luine VN. 2010 Changes in anxiety and cognition due to reproductive  
414 experience: A review of data from rodent and human mothers. *Neuroscience & Biobehavioral*  
415 *Reviews* **34**, 452–467. (doi:10.1016/j.neubiorev.2009.08.011)
- 416 22. Russell JA, Douglas AJ, Ingram CD. 2001 Chapter 1 Brain preparations for maternity —  
417 adaptive changes in behavioral and neuroendocrine systems during pregnancy and lactation.  
418 An overview. In *Progress in Brain Research*, pp. 1–38. Elsevier. (doi:10.1016/S0079-  
419 6123(01)33002-9)
- 420 23. Koolhaas JM, Korte SM, De Boer SF, Van Der Vegt BJ, Van Reenen CG, Hopster H, De  
421 Jong IC, Ruis M a. W, Blokhuis HJ. 1999 Coping styles in animals: current status in behavior  
422 and stress-physiology. *Neurosci. Biobehav. Rev.* **23**, 925–935. (doi:10.1016/S0149-  
423 7634(99)00026-3)
- 424 24. Roufidou C, Sebire M, Katsiadaki I, Mustafa A, Schmitz M, Mayer I, Shao YT, Borg B. 2016  
425 Overripening of eggs and changes in reproductive hormones in the threespine stickleback,  
426 *Gasterosteus aculeatus*. *Evolutionary Ecology Research* **17**, 583–601.

- 427 25. Stoffel MA, Nakagawa S, Schielzeth H. 2018 rptR: repeatability estimation and variance  
428 decomposition by generalized linear mixed-effects models. *Methods in Ecology and Evolution*  
429 **8**, 1639–1644. (doi:10.1111/2041-210X.12797)
- 430 26. Bates D *et al.* 2019 *lme4: Linear Mixed-Effects Models using 'Eigen' and S4*. R package  
431 version. See <https://CRAN.R-project.org/package=lme4>.
- 432 27. Kraak SBM, Bakker TCM. 1998 Mutual mate choice in sticklebacks: attractive males  
433 choose big females, which lay big eggs. *Animal Behaviour* **56**, 859–866.  
434 (doi:10.1006/anbe.1998.0822)
- 435 28. Neyer FJ, Lehnart J. 2007 Relationships matter in personality development: evidence  
436 from an 8-Year longitudinal study across young adulthood. *Journal of Personality* **75**, 535–  
437 568. (doi:10.1111/j.1467-6494.2007.00448.x)
- 438 29. Kandler C, Bleidorn W, Riemann R, Angleitner A, Spinath FM. 2012 Life events as  
439 environmental states and genetic traits and the role of personality: a longitudinal twin study.  
440 *Behav Genet* **42**, 57–72. (doi:10.1007/s10519-011-9491-0)
- 441 30. Rebar D, Zuk M, Bailey NW. 2011 Mating experience in field crickets modifies pre- and  
442 postcopulatory female choice in parallel. *Behav Ecol* **22**, 303–309.  
443 (doi:10.1093/beheco/arq195)
- 444 31. Real L. 1990 Search theory and mate choice. I. Models of single-sex discrimination. *The*  
445 *American Naturalist* **136**, 376–405. (doi:10.1086/285103)
- 446 32. Milinski M, Bakker TCM. 1990 Female sticklebacks use male coloration in mate choice  
447 and hence avoid parasitized males. *Nature* **344**, 330–333. (doi:10.1038/344330a0)
- 448 33. Tinghitella RM, Weigel EG, Head M, Boughman JW. 2013 Flexible mate choice when  
449 mates are rare and time is short. *Ecology and Evolution* **3**, 2820–2831.  
450 (doi:10.1002/ece3.666)
- 451 34. Lam TJ, Chan K, Hoar WS. 1979 Effect of progesterone and estradiol-17 $\beta$  on ovarian fluid  
452 secretion in the threespine stickleback, *Gasterosteus aculeatus* L., form trachurus. *Can. J.*  
453 *Zool.* **57**, 468–471. (doi:10.1139/z79-056)
- 454 35. Nagahama Y, Yoshikuni M, Yamashita M, Tokumoto T, Katsu Y. 1995 4 Regulation of  
455 oocyte growth and maturation in fish. In *Current Topics in Developmental Biology* (eds RA  
456 Pedersen, GP Schatten), pp. 103–145. Academic Press. (doi:10.1016/S0070-2153(08)60565-  
457 7)
- 458 36. Nagahama Y. 2002 Endocrine regulation of gametogenesis in fish. *Int. J. Dev. Biol.* **38**,  
459 217–229. (doi:10.1387/ijdb.7981031)

- 460 37. Peter RE, Yu KL. 1997 Neuroendocrine regulation of ovulation in fishes: basic and  
461 applied aspects. *Reviews in Fish Biology and Fisheries* **7**, 173–197.  
462 (doi:10.1023/A:1018431610220)
- 463 38. Mclennan DA. 2005 Changes in response to olfactory cues across the ovulatory cycle in  
464 brook sticklebacks, *Culaea inconstans*. *Animal Behaviour* **69**, 181–188.  
465 (doi:10.1016/j.anbehav.2003.11.025)
- 466 39. Munakata A, Kobayashi M. 2010 Endocrine control of sexual behavior in teleost fish.  
467 *General and Comparative Endocrinology* **165**, 456–468. (doi:10.1016/j.ygcen.2009.04.011)
- 468 40. Stamps J, Groothuis TGG. 2010 The development of animal personality: relevance,  
469 concepts and perspectives. *Biological Reviews* **85**, 301–325. (doi:10.1111/j.1469-  
470 185X.2009.00103.x)
- 471 41. Monestier C, Bell AM. 2020 Data from: Personality traits change after an opportunity to mate.  
472 Dryad Digital Repository. (doi:10.5061/dryad.wstqjq2h3)

## Figures

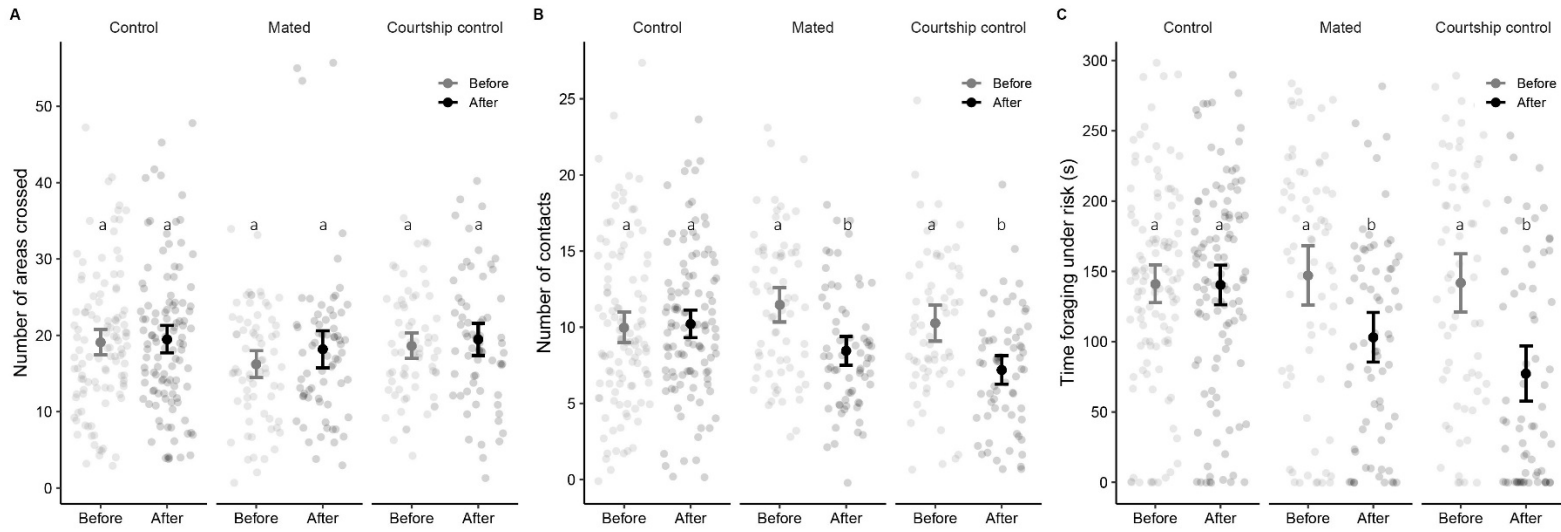

**Figure 1. Mean-level change in behavior as a function of courtship and mating.** Bars represent 95% confidence intervals. Different letters within each figure indicate means that are significantly different (p-val < 0.05).

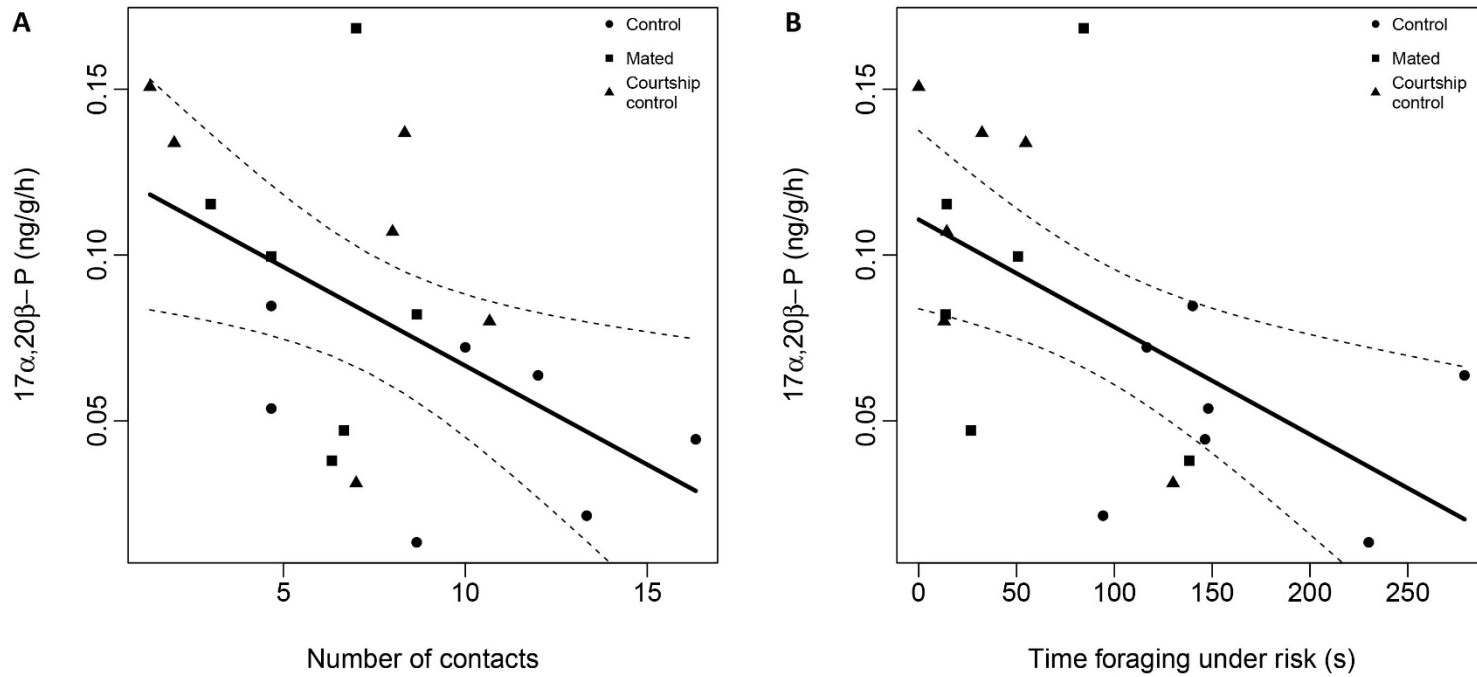

**Figure 2. Relationship between progesterone and A) the social behavior (number of contacts), and B) the risk taking behavior (time foraging under risk) during the “After” trials.** Each circle represents the average time an individual spent foraging under risk during the three “After” trials. The dashed line represents the 95% confidence interval.

## Table

| Treatment groups         | Activity:<br>number of areas crossed |        |                   | Social behavior:<br>number of contacts |        |                   | Risk taking behavior:<br>time foraging under risk |        |                   |
|--------------------------|--------------------------------------|--------|-------------------|----------------------------------------|--------|-------------------|---------------------------------------------------|--------|-------------------|
|                          | Among                                | Within | R                 | Among                                  | Within | R                 | Among                                             | Within | R                 |
| Control (n=37)           | 54.6                                 | 31.17  | 0.64 (0.48, 0.74) | 15.46                                  | 10.58  | 0.59 (0.43, 0.71) | 4332                                              | 1051   | 0.81 (0.71, 0.87) |
| Mated (n=22)             | 34.81                                | 44.89  | 0.44 (0.22, 0.59) | 7.11                                   | 14.27  | 0.33 (0.12, 0.51) | 3158                                              | 3935   | 0.45 (0.22, 0.61) |
| Courtship control (n=23) | 32.47                                | 27.35  | 0.53 (0.32, 0.69) | 6.54                                   | 14.78  | 0.31 (0.12, 0.49) | 2775                                              | 5059   | 0.35 (0.14, 0.53) |

**Table 1. Repeatability (R) and variance components (among- and within-individual) of behavioral traits across the before and after trials.**

## Supplemental material

### Figures

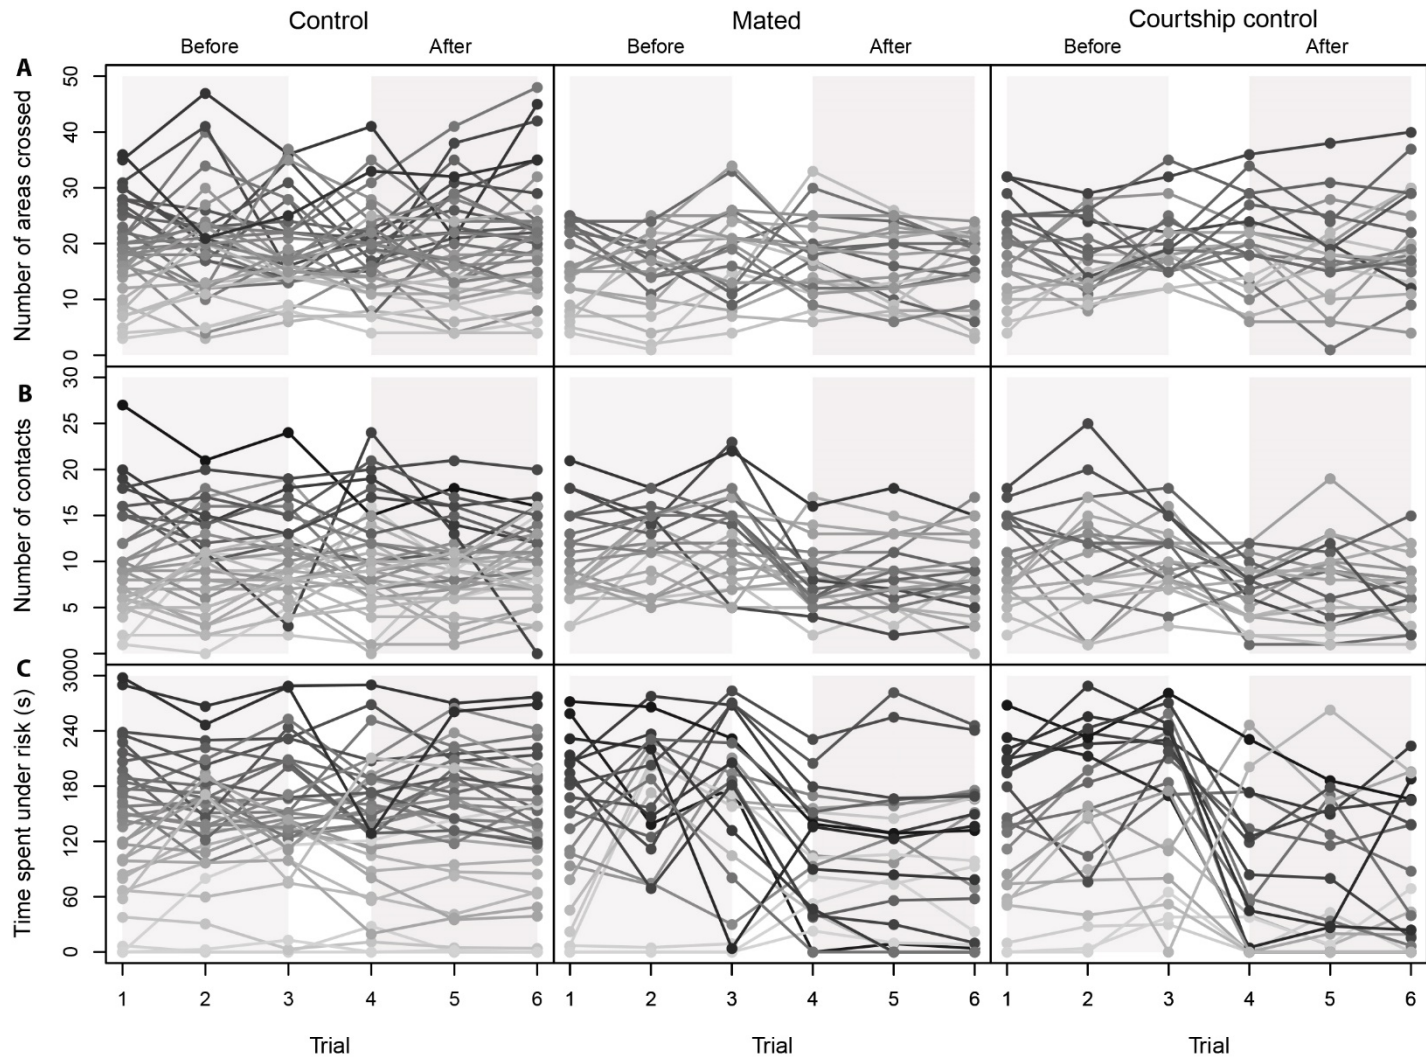

**Figure S1. Behavioral reaction norms showing individual differences in behavior the three treatment groups.** Top to bottom shows: A) number of areas crossed during the activity assay, B) number of contacts during the social behavior assay and C) time spent foraging under risk during the risk taking behavior assay. Each line represents the behavior of a different individual female across all six trials in shades of grey. Trials 1-3 represent behaviors measured during the “Before” trials, trials 4-6 represent behaviors measured during the “After” trials.

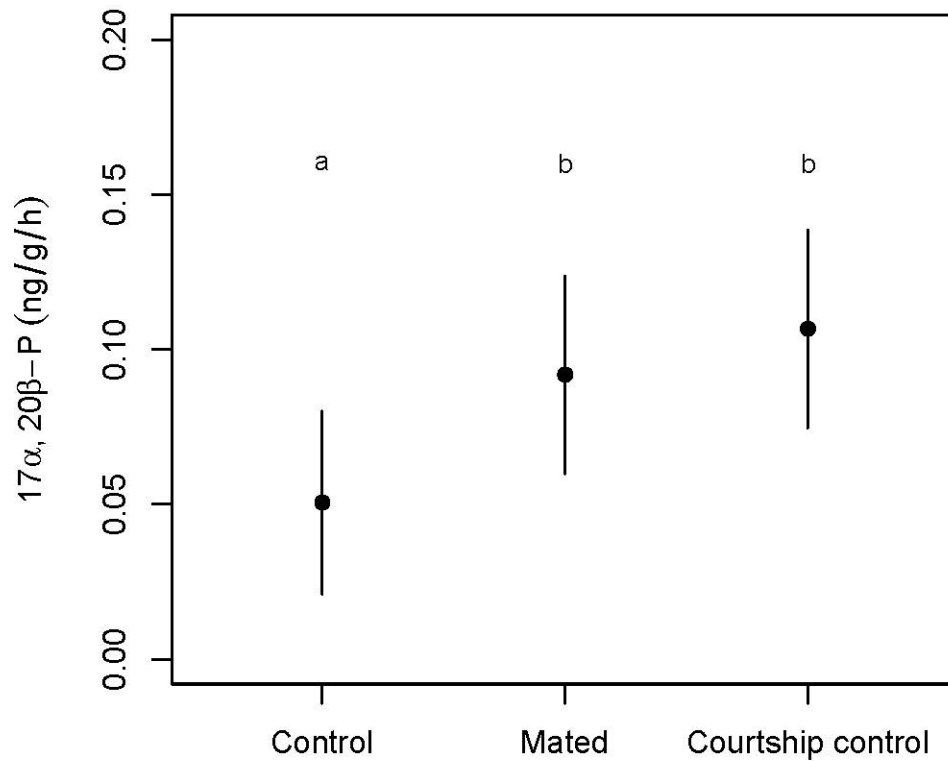

**Figure S2. Differences in average excreted progesterone among treatment groups.** Shown are the “After” progesterone levels. Bars represent the 95% confidence interval. Different letters indicate means that are significantly different (p-val < 0.05).



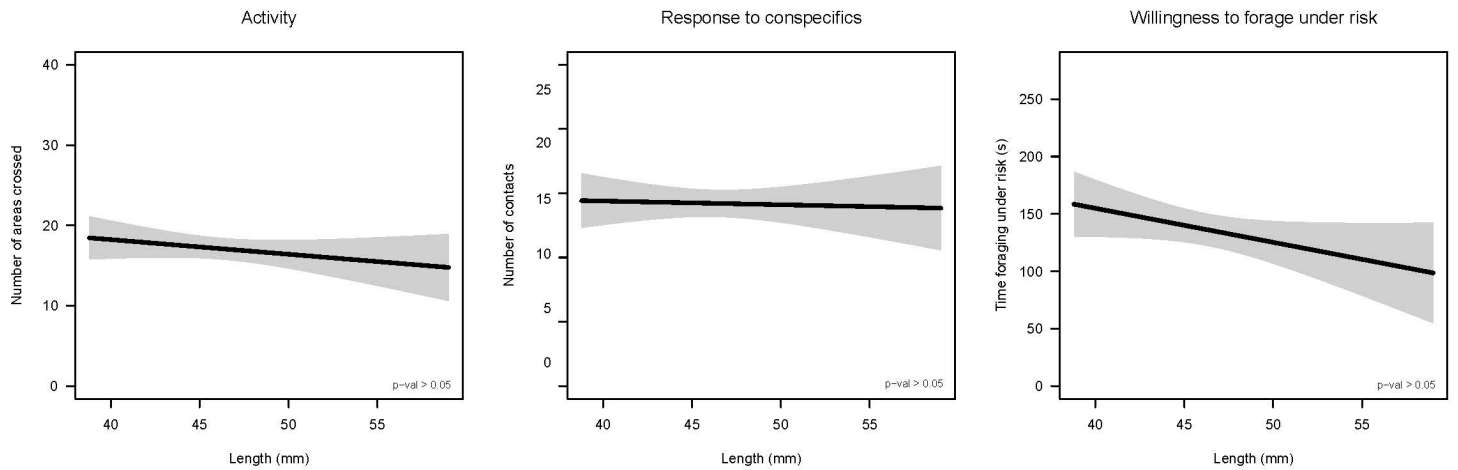

**Figure S3. There was no relationship between body size (standard length) and behavior (A: activity, B: social behavior, C: risk taking behavior).** The graph shows the predicted linear regression between length and each behavior, and the associated confidence interval (95%). Shown from left to right are the number of areas crossed during the activity assay, the number of contacts during the social behavior assay, and the time foraging under risk during the risk taking assay.

## Tables

|                                 | Mating opportunity | Control           |
|---------------------------------|--------------------|-------------------|
| <b>Number of areas crossed</b>  |                    |                   |
| Among                           | 26.17              | 44.72             |
| Within                          | 24.88              | 35.66             |
| R                               | 0.463 (0.28, 0.62) | 0.55 (0.34, 0.69) |
| <b>Number of contacts</b>       |                    |                   |
| Among                           | 13.47              | 15.32             |
| Within                          | 9.52               | 7.70              |
| R                               | 0.58 (0.40, 0.72)  | 0.66 (0.48, 0.76) |
| <b>Time foraging under risk</b> |                    |                   |
| Among                           | 4435.90            | 4425.90           |
| Within                          | 2858.50            | 757.10            |
| R                               | 0.59 (0.43, 0.81)  | 0.85 (0.75, 0.91) |

**Table S1. Repeatability (R) and variance component (among- and within-individual) of behavioral traits during the “Before” trials.** For both control females and females in the mating opportunity treatment we estimated the repeatability of activity (number of crossed areas), their social behavior (number of contacts), and their risk taking behavior (time foraging under risk) across the three “Before” trials. Models included individual as a random effect and adjusted models included trial as a co-variate. Numbers in brackets indicate 95% credibility intervals (82 individuals with 3 repetitions). Repeatability, among- and between-individual variation did not differ between the two groups prior to the experience of courtship and reproduction.

| <b>Social behavior</b>       |                         |                   |                              |
|------------------------------|-------------------------|-------------------|------------------------------|
|                              | Number of areas crossed | Number of orients | Time spent with conspecifics |
| <b>Social behavior</b>       |                         |                   |                              |
| Number of contacts           | 1                       | 0.38              | 0.36                         |
| Number of orients            |                         | 1                 | -0.42                        |
| Time spent with conspecifics |                         |                   | 1                            |

  

| <b>Risk taking behavior</b>    |                              |                 |                                |
|--------------------------------|------------------------------|-----------------|--------------------------------|
|                                | Latency to forage under risk | Number of pecks | Time spent foraging under risk |
| <b>Risk taking behavior</b>    |                              |                 |                                |
| Latency to forage under risk   | 1                            | -0.67           | 0.52                           |
| Number of pecks                |                              | 1               | 0.70                           |
| Time spent foraging under risk |                              |                 | 1                              |

**Table S2. Matrix of the Spearman's correlation coefficients among behaviors for the social behavior and the risk taking behavior assays; behaviors were averaged across the six trials (n=82 individuals).**
